# Supplementary material for: The most extreme rainfall erosivity event ever recorded in China up to 2022: the 7.20 storm in Henan Province
Source: Copernicus journal article supplement (doi:10.5194/hess-27-4563-2023), 2023-12-20
Supplement: Supplementary file 1 [file hess-27-4563-2023-supplement.pdf]

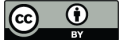

*Supplement of*

## **The most extreme rainfall erosivity event ever recorded in China up to 2022: the 7.20 storm in Henan Province**

**Yuanyuan Xiao et al.**

*Correspondence to:* Shuiqing Yin ([yinshuiqing@bnu.edu.cn](mailto:yinshuiqing@bnu.edu.cn))

The copyright of individual parts of the supplement might differ from the article licence.

## 5 Supplement

### S1: Estimation of rainfall erosivity from the different kinetic energy–intensity (KE-I) equations

10 **Table S1.1: Different versions of KE-I equations.**

| Version                           | KE-I equation                                                                                                                                                         |
|-----------------------------------|-----------------------------------------------------------------------------------------------------------------------------------------------------------------------|
| USLE (Wischmeier and Smith, 1978) | $e_r = \begin{cases} 0.119 + 0.0873 \cdot \log_{10}(i_r) & i_r \leq 76 \text{ mm} \cdot \text{h}^{-1} \\ 0.283 & i_r > 76 \text{ mm} \cdot \text{h}^{-1} \end{cases}$ |
| RUSLE (Renard et al., 1997)       | $e_r = 0.29 \cdot [1 - 0.72 \cdot \exp(-0.05 \cdot i_r)]$                                                                                                             |
| RUSLE 2 (USDA–ARS, 2013)          | $e_r = 0.29 \cdot [1 - 0.72 \cdot \exp(-0.082 \cdot i_r)]$                                                                                                            |
| Dijk (van Dijk et al., 2002)      | $e_r = 28.3 \cdot [1 - 0.52 \cdot \exp(-0.042 \cdot i_r)]$                                                                                                            |

**Table S1.2: Comparison of the maximum event kinetic energy (KE) and return period (RP) from the KE-I equations of USLE, RUSLE and van Dijk’s with those from the RUSLE2. DE: relative difference.**

|          | The “7.20” storm          |       | Event kinetic energy (1951-2020) |                | RP (years) |
|----------|---------------------------|-------|----------------------------------|----------------|------------|
|          | KE (MJ·ha <sup>-1</sup> ) | DE    | KE (MJ·ha <sup>-1</sup> )        | DE             |            |
| RUSLE2   | 195.8                     | 0     | 5.1 ~ 49.7                       | 0              | 19,200     |
| USLE     | 190.2                     | -3.1% | 5.4 ~ 46.7                       | -8.7% ~ 23.1%  | 39,100     |
| RUSLE    | 179.6                     | -8.2% | 4.5 ~ 46.6                       | -16.9% ~ -2.0% | 23,900     |
| van Dijk | 184.0                     | -6.1% | 5.0 ~ 46.2                       | -11.8% ~ 28.7% | 51,800     |

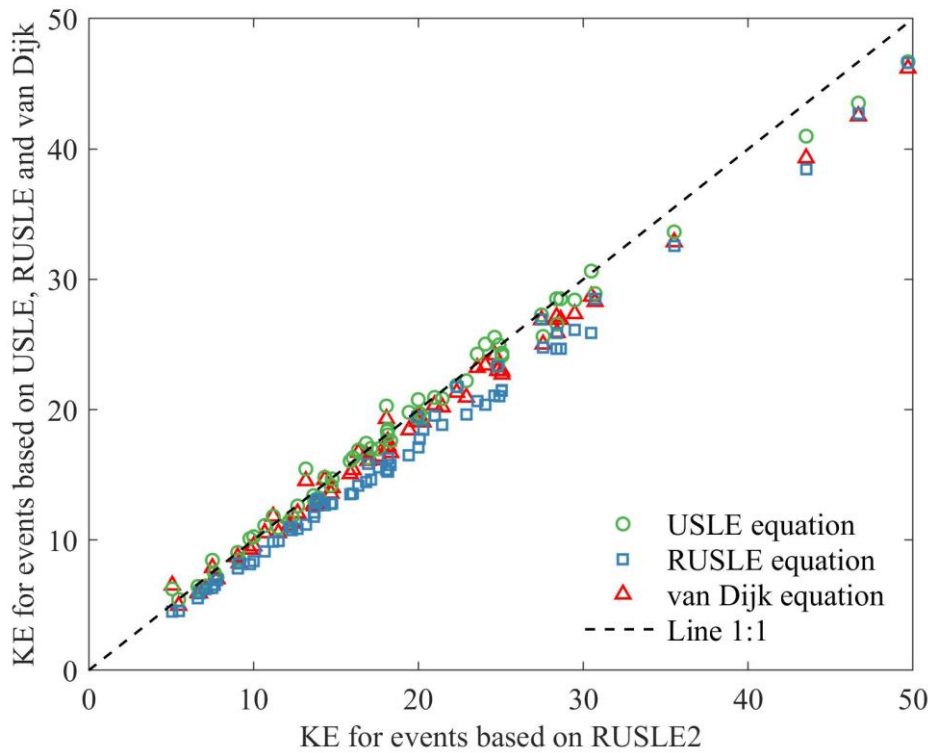

15

**Figure S1.1: Comparison of the annual maximum event kinetic energy (KE) using four different KE-I equations for Zhengzhou meteorological station from 1951-2020.**

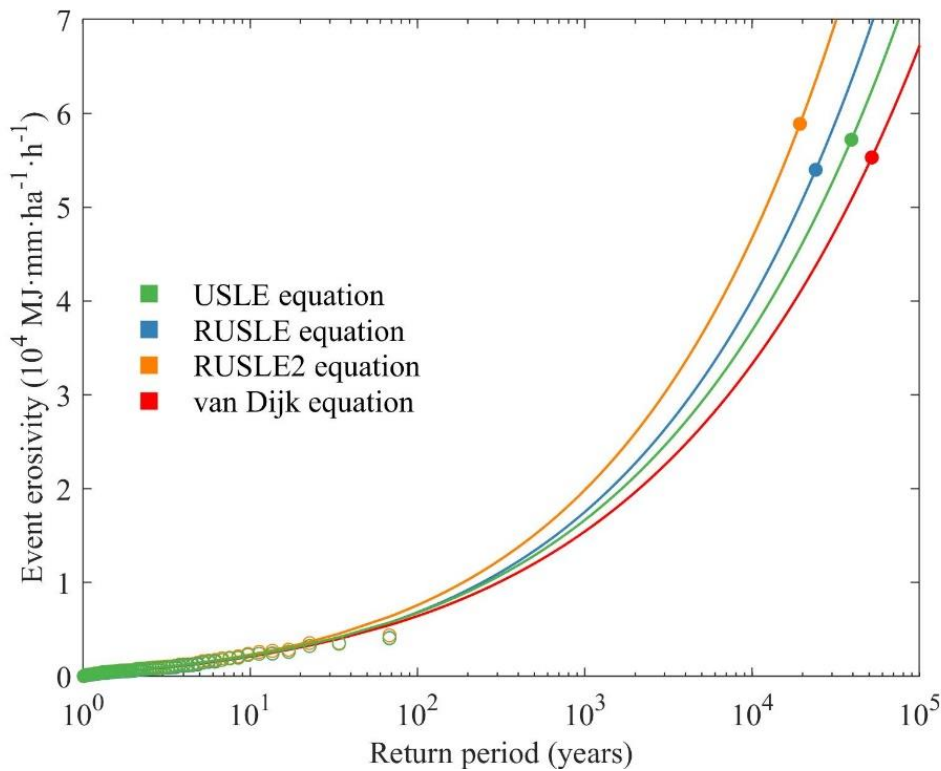

20

**Figure S1.2: Observed event rainfall erosivity as a function of the return period assuming LP-III using four different KE-I equations for Zhengzhou meteorological station. The open circles are observations for the period 1951-2020, the solid circles indicate the “7.20” storm in 2021, and the solid lines represent the fitted P-III distribution using the logarithm of observations from 1951-2020.**

S2: Calculation of conversion factor

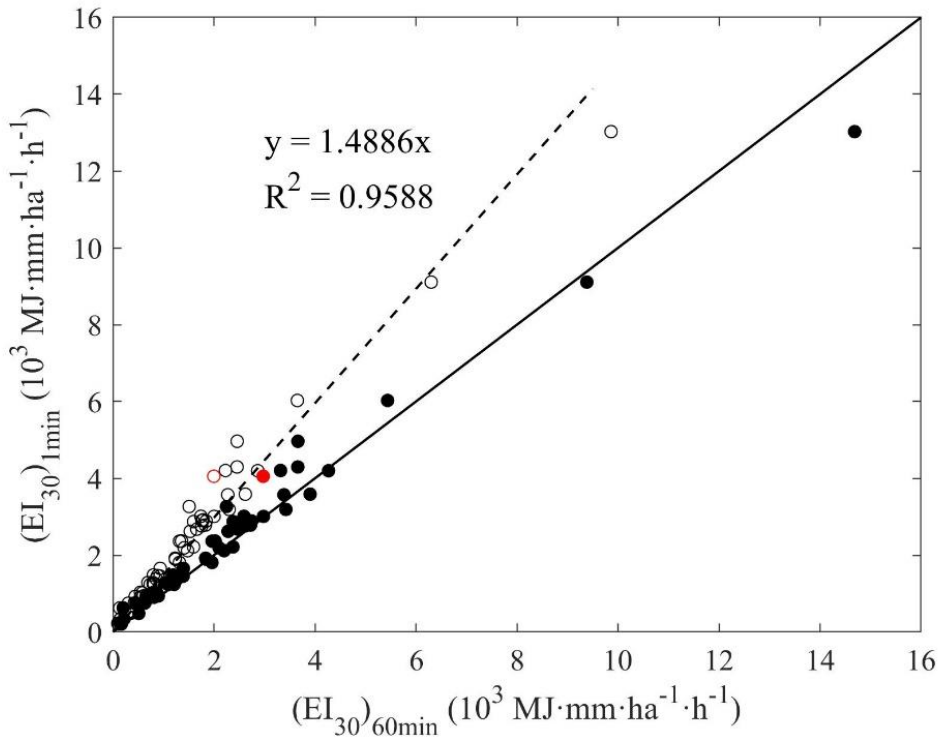

25 Figure S2.1: A comparison of 1-in-10-year  $EI_{30}$  values estimated with one-min versus 60-min data. The dashed line represents the best fit using a linear model through the origin. Open circles are 1-in-10-year  $EI_{30}$  values estimated 60-min data without conversions, and solid circles are values adjusted with a conversion factor of 1.489 for the 62 meteorological stations in China. The open and solid circles in red refer to the Zhengzhou meteorological station. (Yue et al., 2020)

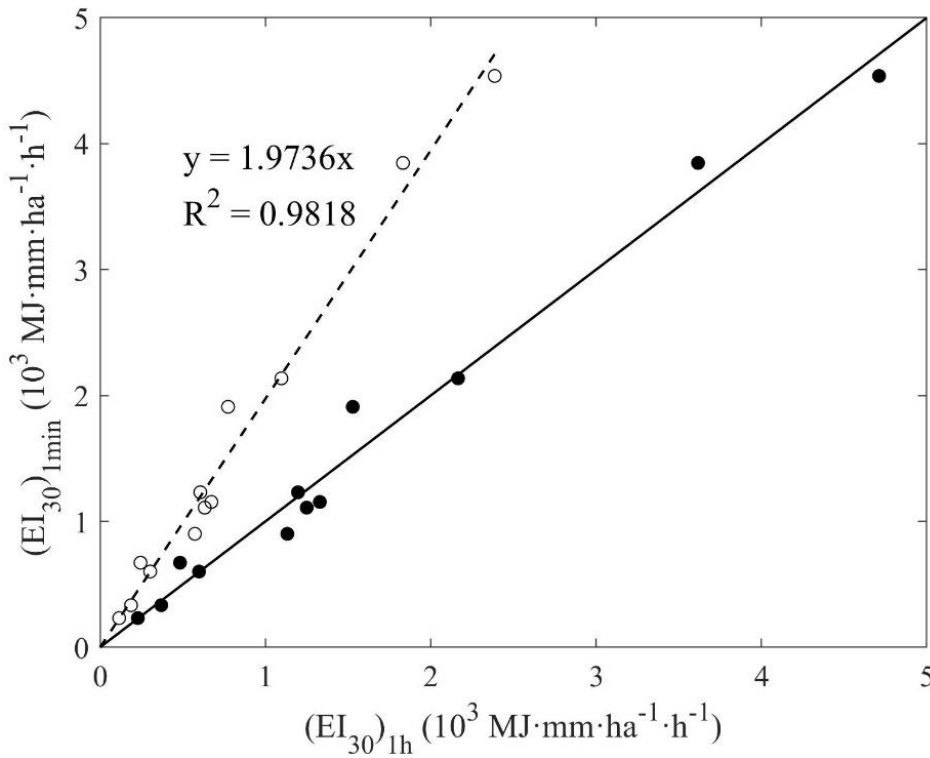

30 Figure S2.2: A comparison of annual maximum  $EI_{30}$  values estimated with one-min versus one-hour data in Zhengzhou meteorological station from 2005 to 2016. The dashed line represents the best fit using a linear model through the origin. Open circles are  $EI_{30}$  values estimated one-hour data without conversions, and solid circles are values adjusted with a conversion factor of 1.974 for the Zhengzhou meteorological station.

### S3: Testing of three frequency distributions

35 **Table S3.1: Generalized extreme value (GEV) and P-III distribution used in hydrology. Method of L-moments was used for the parameter estimation of GEV (Hosking, 1990). (PDF: probability density function; CDF: cumulative distribution function;  $\Gamma(\alpha)$ : gamma function)**

| Distribution | GEV                                                                                                                                     | Reference                                   |
|--------------|-----------------------------------------------------------------------------------------------------------------------------------------|---------------------------------------------|
| PDF          | $f(x) = \frac{1}{\sigma} \left[ 1 - k \left( \frac{x - \mu}{\sigma} \right) \right]^{1/k-1} e^{-[1 - k(\frac{x - \mu}{\sigma})]^{1/k}}$ | Coles, 1990; Jenkinson, 1955                |
| CDF          | $F(x) = e^{-[1 - k(\frac{x - \mu}{\sigma})]^{1/k}}$                                                                                     |                                             |
| Range        | $k \neq 0$                                                                                                                              |                                             |
| Distribution | P-III                                                                                                                                   | Reference                                   |
| PDF          | $f(x) = \frac{\beta^\alpha}{\Gamma(\alpha)} (x - a_0)^{\alpha-1} e^{-\beta(x-a_0)}$                                                     | Ministry of Water Resources, P. R. C., 2006 |
| CDF          | $F(x) = \frac{\beta^\alpha}{\Gamma(\alpha)} \int_{a_0}^x (x - a_0)^{\alpha-1} e^{-\beta(x-a_0)} dx$                                     |                                             |
| Range        | $x > a_0, \alpha > 0, \beta > 0$                                                                                                        |                                             |

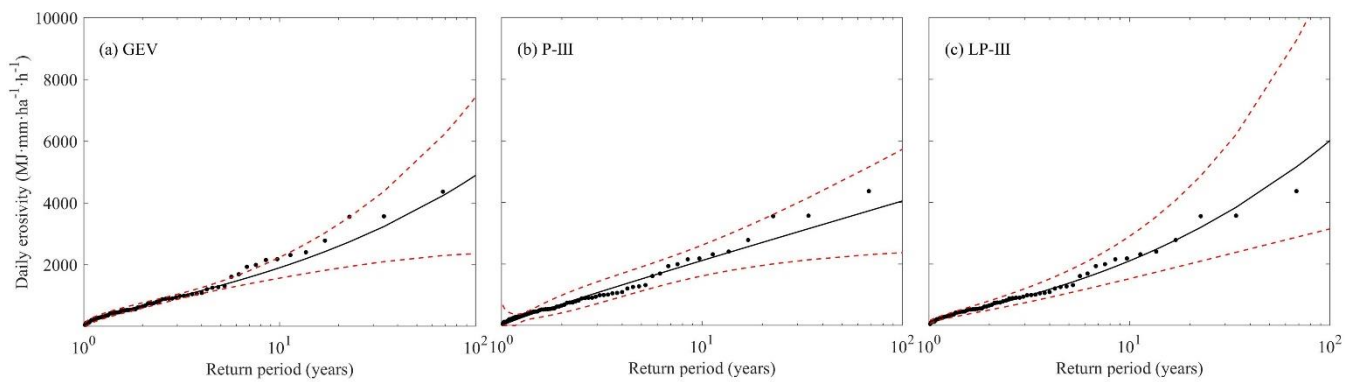

40 **Figure S3.1: Observed daily rainfall erosivity as a function of the return period assuming (a) GEV, (b) P-III and (c) LP-III for Zhengzhou meteorological station. Black solid circles are observations from the period 1951-2020. The dashed lines represent the 95% confidence interval.**

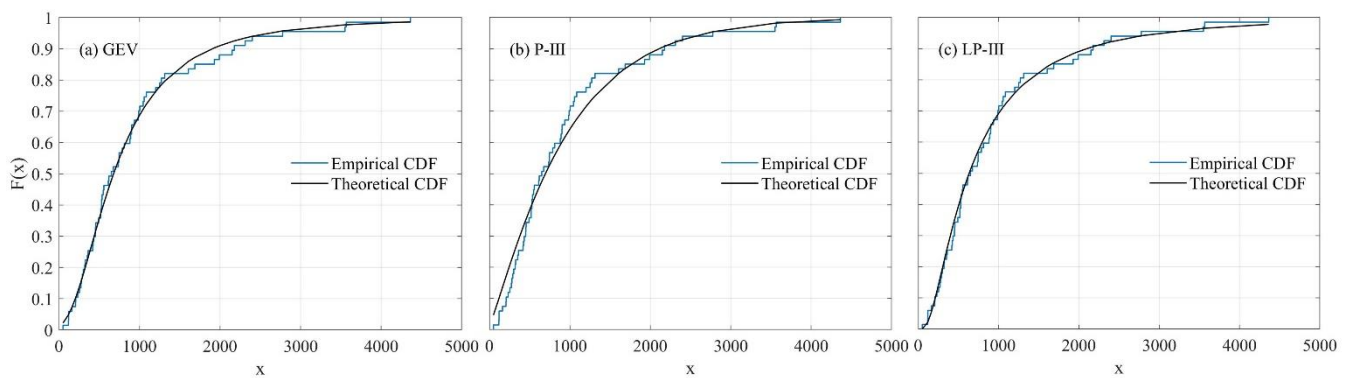

45 **Figure S3.2: The cumulative distribution function of (a) GEV, (b) P-III and (c) LP-III of observed daily rainfall erosivity for Zhengzhou meteorological station.**

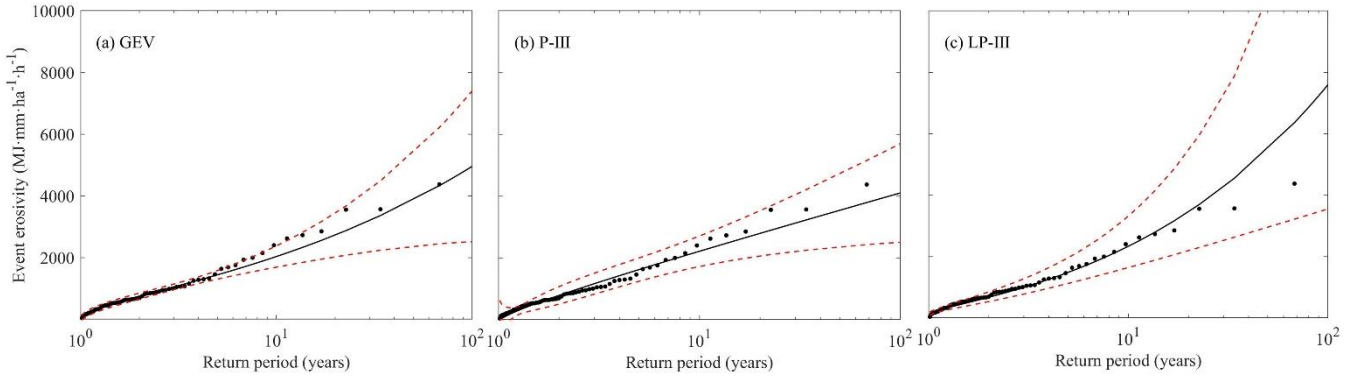

**Figure S3.3: Observed event rainfall erosivity as a function of the return period assuming (a) GEV, (b) P-III and (c) LP-III for Zhengzhou meteorological station. Black solid circles are observations from the period 1951-2020. The dashed lines represent the 95% confidence interval.**

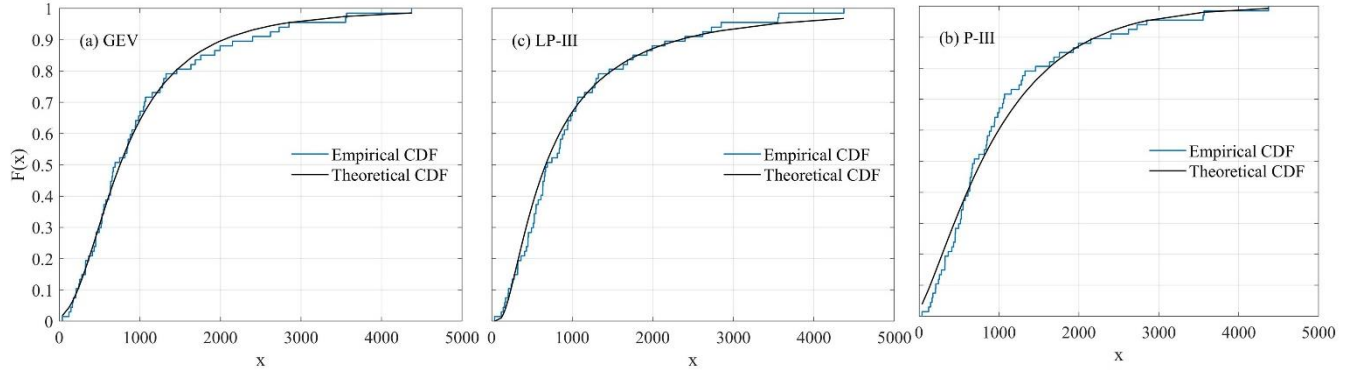

**Figure S3.4: The cumulative distribution function of (a) GEV, (b) P-III and (c) LP-III of observed event rainfall erosivity for Zhengzhou meteorological station.**

**Table S3.2. Correlation coefficient (CC) Kolmogorov-Smirnov test (K-S test) of daily and event rainfall erosivity.**

| Statistical Metrics |                | GEV     | P-III     | LP-III   |
|---------------------|----------------|---------|-----------|----------|
| Daily erosivity     | CC             | 0.9820  | 0.9849    | 0.9907   |
|                     | K-S value      | 0.0574  | 0.0950    | 0.0642   |
|                     | p-value        | 0.9708  | 0.5483    | 0.928655 |
|                     | Return periods | 65,500  | $+\infty$ | 53,700   |
| Event erosivity     | CC             | 0.9791  | 0.9868    | 0.9790   |
|                     | K-S value      | 0.0507  | 0.0849    | 0.0853   |
|                     | p-value        | 0.9919  | 0.6870    | 0.6818   |
|                     | Return periods | 340,600 | $+\infty$ | 19,200   |

**Statistics used in Table S3.2:**

In order to assess the goodness-of-fit (GOF) of the GEV, P-III, and LP-III Gumbel distributions, using the Kolmogorov-Smirnov (K-S) test (Haktanir, 1991). The smaller the value of the K-S test statistic, the better the fitting of the distribution. Correlation coefficient (CC) was chosen to measure the difference between the estimated value and the measured data (see Eq. (1)). CC was used to represent the level of agreement between P datasets and gauge observations.

$$CC = \frac{\sum_{i=1}^n (S_i - \bar{S}) \cdot (G_i - \bar{G})}{\sqrt{\sum_{i=1}^n (S_i - \bar{S})^2 \cdot \sum_{i=1}^n (G_i - \bar{G})^2}} \quad (1)$$

where  $n$  is the number of years or the sample size;  $i$  is the  $i^{\text{th}}$  of the estimated value and the measured data;  $G_i$  means observations and  $\bar{G}$  is the average of observation.  $S_i$  and  $\bar{S}$  are the estimated values and their average, respectively.

## Reference

- Coles, S.: An introduction to statistical modeling of extreme values, New York, Springer Verlag, 36–78, 1990.
- Haktanir, T.: Practical computation of gamma frequency factors, *Hydrol. Sci. J.*, 36(6): 599-610, 1991.
- Hosking, J. R. M.: L-Moments: Analysis and Estimation of Distributions Using Linear Combinations of Order Statistics, *J. R. Stat. Soc., Ser. B., Methodol.*, 52, 105–124, <http://www.jstor.org/stable/2345653>, 1990.
- 70 Jenkinson, A. E.: The frequency distribution of the annual maximum (or minimum) values of meteorological elements, *Q. J. R. Meteorol. Soc.*, 81(348): 158-171, 1955.
- Ministry of Water Resources, P. R. C.: Some suggestions of strengthening flood control construction in Taihu Basin, 2001-2010, Beijing: China Water Power Press, 2001 (in Chinese).
- 75 Renard, K. G., Foster, G. R., Weesies, G. A., McCool, D. K., and Yoder, D. C.: Predicting soil erosion by water: a guide to conservation planning with the revised universal soil loss equation (RUSLE), *Agriculture Handbook*, US Department of Agriculture, Washington, D. C., 1997.
- USDA-ARS.: Science documentation: Revised universal soil loss equation version2 (RUSLE2), US Department of Agriculture, Agricultural Research Service, Washington, D.C., 2013.
- 80 van Dijk, A. I. J. M., Bruijnzeel, L. A., and Rosewell, C. J.: Rainfall intensity–kinetic energy relationships: A critical literature appraisal, *J. Hydrol.*, 261: 1–23, [https://doi.org/10.1016/S0022-1694\(02\)00020-3](https://doi.org/10.1016/S0022-1694(02)00020-3), 2002.
- Wischmeier, W. H. and Smith, D. D.: Predicting rainfall erosion losses: A guide to conservation planning, *Agriculture Handbook*, US Department of Agriculture, Washington, D. C., 1978.
- 85 Yue, T. Y., Xie, Y., Yin, S. Q., Yu, B. F., Miao, C. Y., and Wang, W. T.: Effect of time resolution of rainfall measurements on the erosivity factor in the USLE in China, *ISWCR*, 8, 373–382, <https://doi.org/10.1016/j.iswcr.2020.06.001>, 2020.
